# Supplementary material for: Successful child sexual violence prevention efforts start with data: how the Violence Against Children and Youth Survey helped curb the tide of child sexual violence in 20 countries
Source: PubMed Central journal article supplement — BMJ Paediatr Open. 2024 Mar 12;8(1):e002497. doi: 10.1136/bmjpo-2024-002497 (PMC10936510; doi:10.1136/bmjpo-2024-002497), 2024-03-12
Supplement: bmjpo-2024-002497.draft_revisions.pdf [file bmjpo-2024-002497.draft_revisions.pdf]

# BMJ Paediatrics Open

BMJ Paediatrics Open is committed to open peer review. As part of this commitment we make the peer review history of every article we publish publicly available.

When an article is published we post the peer reviewers' comments and the authors' responses online. We also post the versions of the paper that were used during peer review. These are the versions that the peer review comments apply to.

The versions of the paper that follow are the versions that were submitted during the peer review process. They are not the versions of record or the final published versions. They should not be cited or distributed as the published version of this manuscript.

BMJ Paediatrics Open is an open access journal and the full, final, typeset and author-corrected version of record of the manuscript is available on our site with no access controls, subscription charges or pay-per-view fees (<http://bmjpaedsopen.bmj.com>).

If you have any questions on BMJ Paediatrics Open's open peer review process please email [info.bmjpo@bmj.com](mailto:info.bmjpo@bmj.com)

# BMJ Paediatrics Open

## Global prevalence of childhood sexual violence from 20 countries using the Violence Against Children and Youth Surveys

|                               |                                                                                                                                                                                                                                                                                                                                                                                                                                                                                                                                                                                                                                                                         |
|-------------------------------|-------------------------------------------------------------------------------------------------------------------------------------------------------------------------------------------------------------------------------------------------------------------------------------------------------------------------------------------------------------------------------------------------------------------------------------------------------------------------------------------------------------------------------------------------------------------------------------------------------------------------------------------------------------------------|
| Journal:                      | <i>BMJ Paediatrics Open</i>                                                                                                                                                                                                                                                                                                                                                                                                                                                                                                                                                                                                                                             |
| Manuscript ID                 | bmjpo-2024-002497                                                                                                                                                                                                                                                                                                                                                                                                                                                                                                                                                                                                                                                       |
| Article Type:                 | Viewpoint                                                                                                                                                                                                                                                                                                                                                                                                                                                                                                                                                                                                                                                               |
| Date Submitted by the Author: | 16-Jan-2024                                                                                                                                                                                                                                                                                                                                                                                                                                                                                                                                                                                                                                                             |
| Complete List of Authors:     | Chiang, Laura; CDC, Division of Violence Prevention<br>Miedema, Stephanie; CDC, Division of Violence Prevention<br>Saul, Janet; US Department of State, Bureau of Global Health Security and Diplomacy<br>Mercy, James; CDC, Division of Violence Prevention<br>Brooks, Andrew; UNICEF Eastern and Southern Africa Regional Office<br>Butchart, Alexander; World Health Organization, Prevention of Violence Unit<br>Bachman, Gretchen; USAID<br>Hegle, Jennifer; CDC, Division of Global HIV and TB<br>Ligiero, Daniela; Together for Girls<br>Logan, J.; CDC, Division of Global HIV and TB<br>Masseti, Greta; CDC, National Center for Injury Prevention and Control |
| Keywords:                     | Child Abuse, Epidemiology, Statistics                                                                                                                                                                                                                                                                                                                                                                                                                                                                                                                                                                                                                                   |
|                               |                                                                                                                                                                                                                                                                                                                                                                                                                                                                                                                                                                                                                                                                         |

SCHOLARONE™  
Manuscripts

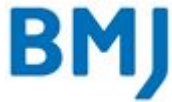

I, the Submitting Author has the right to grant and does grant on behalf of all authors of the Work (as defined in the below author licence), an exclusive licence and/or a non-exclusive licence for contributions from authors who are: i) UK Crown employees; ii) where BMJ has agreed a CC-BY licence shall apply, and/or iii) in accordance with the terms applicable for US Federal Government officers or employees acting as part of their official duties; on a worldwide, perpetual, irrevocable, royalty-free basis to BMJ Publishing Group Ltd ("BMJ") its licensees and where the relevant Journal is co-owned by BMJ to the co-owners of the Journal, to publish the Work in this journal and any other BMJ products and to exploit all rights, as set out in our [licence](#).

The Submitting Author accepts and understands that any supply made under these terms is made by BMJ to the Submitting Author unless you are acting as an employee on behalf of your employer or a postgraduate student of an affiliated institution which is paying any applicable article publishing charge ("APC") for Open Access articles. Where the Submitting Author wishes to make the Work available on an Open Access basis (and intends to pay the relevant APC), the terms of reuse of such Open Access shall be governed by a Creative Commons licence – details of these licences and which [Creative Commons](#) licence will apply to this Work are set out in our licence referred to above.

Other than as permitted in any relevant BMJ Author's Self Archiving Policies, I confirm this Work has not been accepted for publication elsewhere, is not being considered for publication elsewhere and does not duplicate material already published. I confirm all authors consent to publication of this Work and authorise the granting of this licence.

Title: Global prevalence of childhood sexual violence from 20 countries using the Violence Against Children and Youth Surveys

*This work was supported with funding from the U. S. President's Emergency Plan for AIDS Relief (PEPFAR) and the views of the authors do not necessarily reflect those of the U. S. Government or Bureau of Global Health Security and Diplomacy/PEPFAR, the United States Agency for International Development, or the US Centers for Disease Control and Prevention*

## INTRODUCTION

Violence against children is a pervasive global public health and human rights issue, with one billion children experiencing at least one form of violence annually.<sup>1</sup> Extensive scientific literature shows childhood adversity, including sexual violence, to be directly and indirectly associated with a host of health and social consequences with a dose-response effect, consequential intergenerational impacts, and sizable economic ramifications.<sup>2</sup> There is a dearth of population data on the prevalence of childhood sexual violence as well as its antecedents and health and social outcomes, which has hampered violence prevention and child protection efforts globally and locally. Population data are critical, alongside administrative data systems and statistical definitions and classification schemes,<sup>3</sup> for governments to adequately begin addressing violence against children. The absence of national prevalence data has resulted in limited information to guide national policies and prevention strategies, monitor trends, and evaluate prevention efforts. Globally, lack of data on the epidemiologic patterns of violence against children has resulted in deficient prioritization for preventing and responding to this critical problem.

Violence Against Children and Youth Surveys (VACS) collect comprehensive data on violence and have been implemented in over 23 countries in Africa, Asia, the Caribbean, Europe, and Latin America since 2007. VACS have also been repeated in three countries: Zimbabwe (2011; 2017), Kenya (2010; 2019), and Eswatini (2007; 2022). VACS provide extensive data on the prevalence and contexts of all forms of violence, including sexual violence, therefore allowing for targeted prevention and response efforts. VACS further provide the global research community with data to examine the epidemiologic patterns of childhood sexual violence across countries and regions. This article draws on VACS reports and empirical publications, to summarize and describe patterns in childhood sexual violence across countries that have completed VACS and shed light on the global prevalence of childhood sexual violence.

## METHODS

VACS data from 20 countries was used to summarize the prevalence of childhood sexual violence from diverse regions of the world. Both estimates for countries that have repeated VACS are represented in this summary. VACS use a three-stage cluster randomized household sampling design to generate nationally representative estimates of violence against children.<sup>4</sup> (Nguyen et al., 2016). Interviewer-administered surveys are conducted with male and female youth aged 13-24 years, who provide retrospective reports of lifetime experiences. A standard protocol ensures data comparability across countries and protections for participant safety and confidentiality. Participants in need of help with violence or other adversity are offered services and support.

VACS collects data on physical, emotional, and sexual violence, but this discussion is focused on sexual violence. VACS collect data on four types of sexual violence: 1) unwanted sexual touching; 2) attempted forced sex; 3) forced sex; and 4) pressured sex. Experiences of one or more of these types of sexual violence prior to the age of 18 is defined as any childhood sexual violence.

## RESEARCH ETHICS APPROVAL STATEMENT

These studies were all approved by the CDC Institutional Review Board with the IRB ID of IORG0000112. Each country was also reviewed and approved by required local Institutional Review Boards or Ethical Review Committees as required and appropriate for each country.

## RESULTS

Data from 20 countries across four continents highlight that childhood sexual violence is a sizable problem, with lifetime prevalence estimates ranging from 4.4% in Cambodia to 37.2% in Eswatini (2007) for females and from 1.1% in Zimbabwe (2017) to 21.2% in Haiti for males (Table S1, Figure S1). The prevalence of childhood sexual violence declined in the three countries where the VACS was repeated. In Eswatini, data were only collected from females in the first VACS therefore a prevalence comparison was only allowable for the female population. The Eswatini results showed that childhood sexual

1  
2  
3 violence reduced from 32.5% in 2007 to 5.5% in 2022 (Table S1, Figure S1). In Zimbabwe, childhood  
4 sexual violence reduced from 37.2% in 2011 to 9.1% in 2017 among girls; and reduced from 8.9% in  
5 2011 to 1.1% in 2017 among boys (Table S1). In Kenya, the rate of childhood sexual violence reduced  
6 from 31.9% in 2010 to 15.6% in 2018 among girls and reduced from 17.5% in 2010 to 6.4% in 2018  
7 among boys (Table S1, Figure S1).  
8  
9

10 Certain patterns also emerged with respect to contexts for childhood sexual violence. Common  
11 perpetrators of childhood sexual violence are people known to the child: intimate partners, friends and  
12 classmates, family, and neighbors (results available upon request). Further, childhood sexual violence  
13 most often takes place in homes or school (results available upon request). Across all countries, VACS  
14 find that many victims of childhood sexual violence do not disclose their experiences to anyone.  
15 Disclosure of childhood sexual violence to anyone ranged from 13.8% (Lao PDR) to 72.9% (El Salvador)  
16 among females, and from 17.3% (Zimbabwe 2017) to 64.7% (Malawi) among males. A smaller minority  
17 of victims try to seek professional services (<0.1%-25.7% among females; <0.1%-32.6% among males)  
18 and very few successfully receive any services for their experience/s (less than 5% in most of the  
19 countries).  
20  
21

## 22 DISCUSSION

23  
24 Results in this summary provide data from 24 published VACS reports from 20 countries, including three  
25 countries that have repeated VACS. This summary provides insight into the global prevalence and  
26 patterns of childhood sexual violence. VACS have raised awareness and improved understanding of  
27 childhood sexual violence in many countries worldwide, and thereby catalyzed action. After data  
28 collection and analysis, findings are disseminated to multi-sectoral partners within countries, including  
29 relevant government ministries, civil society, and multi-lateral institutions. These partners provide  
30 interpretive context to the results and identify prioritized actions to prevent and respond to childhood  
31 sexual violence in a data to action process. Since 2016, *INSPIRE: Seven Strategies to End Violence Against*  
32 *Children* (<https://www.who.int/publications/i/item/9789241565356>) has guided interpretation of VACS  
33 results and their use in guiding data-driven efforts to address all forms of violence against children,  
34 including sexual violence. INSPIRE has served as a framework to link prioritized indicators from VACS to  
35 evidence-based prevention and response programs and policies for countries to consider introducing,  
36 scaling up or evaluating, depending on their current national strategy.  
37  
38  
39  
40

41 While VACS cannot tell us why childhood sexual violence declined in all three sub-Saharan African  
42 countries that repeated the survey, we do know governments and stakeholders used survey results to  
43 guide violence prevention programming and policy. For example, after the 2010 Kenya VACS, the  
44 government instituted a new constitution which included articles explicitly protecting children from  
45 violence and shortly after passed the Children's Act (2012) and Marriage Act (2014), both of which  
46 further expanded legal protections (Annor et al, 2021).<sup>5</sup> In addition, PEPFAR (The President's Emergency  
47 Plan for AIDS Relief) and the Global Fund have made sizable contributions through HIV prevention  
48 programming in each of these three countries and integrates violence prevention interventions and  
49 post-violence care clinical services. A notable example is the DREAMS initiative that delivers a package  
50 of evidence-based programs on key risk factors of HIV among adolescent girls and young women,  
51 including sexual violence, and reaches approximately 2.9 million girls and young women each year.<sup>6</sup>  
52 VACS data have also informed PEPFAR's investments in strengthening child protection systems through  
53 its Orphans and Vulnerable Children programming. VACS results informed the establishment of a  
54 national child protection management system in Kenya, the introduction of a child-friendly courtroom in  
55 Eswatini, and the scale up of an evidence-based parenting intervention focused on reducing harsh  
56 discipline throughout East and Southern Africa (Cluver et al, 2022).<sup>7</sup>  
57  
58  
59  
60

It is important to consider the impact of UNICEF and WHO as key global health and child protection  
leaders as they have expanded their attention to violence, as well as the targeted work of partners such  
as Together for Girls who take a data driven focus specifically on childhood sexual violence elimination.  
As VACS continue to be implemented globally, and particularly as it is repeated in countries, a clearer  
picture may emerge on global trends in childhood sexual violence. Current results show: a pattern of  
high prevalence; people who perpetrate are typically known and often trusted by their child victims; and  
sexual violence frequently occurs in homes and schools where children should be safest. Further, few  
victims of childhood sexual violence receive professional services. Patterns of VACS results continue to  
demonstrate the gendered nature of sexual violence against girls and boys and highlight the need for  
gender-informed interventions to reduce the risk and mitigate the consequences of childhood sexual  
violence for all youth. Continued and regular population-level data collection, such as through VACS, is

critically important for countries to understand the burden, contexts, and consequences of violence against children and youth and to galvanize action.

This summary is subject to several limitations. First, VACS provide cross-sectional data or in countries that have repeated VACS, serial cross-sectional data. The surveys cannot provide information on why childhood sexual violence declined in those three countries where it has been repeated. Second, the VACS are adapted by key partners in each country and there is some variation in wording of questions between countries. Third, VACS are household surveys and do not collect data on children who are institutionalized or otherwise living outside family care. Complimentary research is needed globally and VACS countries to better understand and interpret patterns of childhood sexual violence, what is contributing to the observed reduction in prevalence and conduct research with youth not captured in a household survey who may be even more vulnerable to violence.

## CONCLUSION

Sexual violence in childhood is a public health and human rights issue with long-term consequences across the lifetime of the affected individuals as well as consequential societal and economic impacts. VACS have documented the prevalence and epidemiologic patterns across more than 24 countries, providing governments and key child protection partners with critical data that can catalyze multi-sectoral action. The countries that have repeated VACS have seen marked improvement in prevalence of violence, demonstrating that violence is preventable, not inevitable. However, much more work remains, given the high prevalence rates still seen in many countries and to understand the reasons for the declining prevalence of childhood sexual violence that has been observed. Population level surveys with close attention to ethical and methodological rigor, such as VACS, are a critical tool to elucidate the problem and ignite action.

## CITATIONS

- Hills S, Mercy J, Amobi A, Kress H. Global Prevalence of Past-year Violence Against Children: A Systematic Review and Minimum Estimates. *Pediatrics*. 2016 Mar;137(3):e20154079.doi: 10.1542/peds.2015-4079.
- Hughes K, Bellis M, Hardcastle K, Sethi D, Butchart A, Mikton C, Jones L, Dunne MP. The effect of multiple adverse childhood experiences on health: a systematic review and meta-analysis. *Lancet Public Health*. 2017 Aug;2(8):e356-e366.doi: 10.1016/S2468-2667(17)30118-4.
- United Nations Children's Fund, International Classification of Violence against Children, UNICEF, New York, 2023.
- Nguyen K, Kress H, Villaveces A, Massetti M. Sampling design and methodology of the Violence Against Children and Youth Surveys. *Injury Prevention*. 2019; 25:321–327. doi:10.1136/injuryprev-2018-042916.
- Annor F, Chiang L, Olouch P, Mang'oli V, Mogaka M, Mwangi M, Ngunjiri A, Obare F, Achia T, Patel P, Massetti GM, Dahlberg LL, Simon TR, Mercy JA. Changes in prevalence of violence and risk factors for violence and HIV among children and young people in Kenya: a comparison of the 2010 and 2019 Kenya Violence Against Children and Youth Surveys. *Lancet Glob Health*. 2022 Jan;10(1):e124-e133. doi: 10.1016/S2214-109X(21)00457-5.
- S Saul J, Toiv N, Cooney C, Beamon T, Borgman M, Bachman G, Akom E, Benevides R, Limb A, Sato K, Achrekar A, Birx D. The evolution of DREAMS: using data for continuous program improvement. *AIDS*. 2022 Jun 15;36(Suppl 1): S5-S14. doi: 10.1097/QAD.0000000000003158. PMID: 35766571.
- L. Cluver, Y. Shenderovich, F. Meinck, M.N. Berezin, J. Doubt, C.L. Ward, J. Parra-Cardona, C. Lombard, J.M. Lachman, C. Wittesaele, I. Wessels, F. Gardner, J.I. Steinert. Parenting, mental health and economic pathways to prevention of violence against children in South Africa. *Social Science & Medicine*, Volume 262, 2020. ISSN 0277-9536. doi: 10.1016/j.socscimed.2020.113194

Table S1. Prevalence, disclosure, and receipt of services of sexual violence before age 18, among 18-24-year-olds, Violence Against Children and Youth Surveys, 2007 - 2022

|                    | Female                    |                                                      |                                            |                                               | Male                      |                                         |                                            |
|--------------------|---------------------------|------------------------------------------------------|--------------------------------------------|-----------------------------------------------|---------------------------|-----------------------------------------|--------------------------------------------|
|                    | Childhood sexual violence | Disclosure of childhood sexual violence <sup>^</sup> | Help-seeking for childhood sexual violence | Receipt of help for childhood sexual violence | Childhood sexual violence | Disclosure of childhood sexual violence | Help-seeking for childhood sexual violence |
|                    | Weighted % (95% CI)       | Weighted % (95% CI)                                  | Weighted % (95% CI)                        | Weighted % (95% CI)                           | Weighted % (95% CI)       | Weighted % (95% CI)                     | Weighted % (95% CI)                        |
| Eswatini- 2007     | 33.3 (32.7 - 41.6)        | 48.0 (40.8 – 55.2)                                   | NA                                         | 13.6 (10.6 – 17.4)                            | -                         | -                                       | -                                          |
| Eswatini- 2022     | 5.5 (4.5-6.5)             | 66.3 (60.9 – 71.7) <sup>□</sup>                      | 25.7 (20.8 – 30.6) <sup>□</sup>            | 23.1 (18.4 – 27.8) <sup>□</sup>               | 2.1 (0.7 – 3.4)*          | 48.4 (32.9 – 63.8) <sup>□</sup>         | **                                         |
| Kenya- 2010        | 31.9 (27.0-36.7)          | 45.9 (38.8 - 53.1)                                   | 6.8 (1.3 - 12.3)                           | 3.4 (0.0 - 7.0)                               | 17.5 (12.9-22.0)          | 35.8 (23.6 - 48.0)                      | 2.1 (0.0 - 4.6)                            |
| Kenya- 2018        | 15.6 (12.5-18.7)          | 41.3 (31.0 - 51.6)                                   | 12.5 (7.4 - 17.7)                          | 10.7 (5.8 - 15.7)                             | 6.4 (2.8-10.0)            | 26.7 (9.8 - 43.6)*                      | 3.2 (1.6 - 4.7)                            |
| Zimbabwe- 2011     | 32.5 (27.7 - 37.3)        | 51.8 <sup>†</sup>                                    | 4.3 <sup>†</sup>                           | 2.7 <sup>†</sup>                              | 8.9 (6.1 - 11.6)          | 45.1 <sup>†</sup>                       | 2.4 <sup>†</sup>                           |
| Zimbabwe- 2017     | 9.1 (8.1–10.0)            | 60.8 (55.7 – 65.9)                                   | 17.1 (13.1-21.2)                           | 14.3 (10.4 – 18.1)                            | 1.1 (0.3–2.0)             | 17.3 (0.0 – 48.1)                       | **                                         |
| Tanzania- 2009     | 26.7 (22.1 - 31.3)        | 52.3 (41.7 – 62.7) <sup>□</sup>                      | 22.0 (16.0 – 29.5) <sup>□</sup>            | 13.0 (7.7 – 21.2) <sup>□</sup>                | 11.6 (8.0 - 15.2)         | 31.4 (21.8 – 42.8) <sup>□</sup>         | 11.5 (6.7 – 19.0)                          |
| Haiti- 2012        | 25.7 (21.8 - 29.6)        | 57.0 (48.3 – 65.7)                                   | NP                                         | NP                                            | 21.2 (17.1 - 25.3)        | 37.4 (28.1 – 46.7)                      | NP                                         |
| Malawi- 2013       | 21.8 (17.7 - 25.9)        | 61.2 (51.3-71.2)                                     | 9.6 (0.0 – 23.5)                           | 9.0 (0.0 – 22.8)                              | 14.8 (10.2 - 19.5)        | 64.7 (50.7 – 78.7)                      | 5.9 (0.0 – 11.0)                           |
| Cambodia- 2013     | 4.4 (2.5 - 6.3)           | 50.6 (32.4 – 68.9)                                   | 38.9 (19.4 – 58.4)                         | NA                                            | 5.6 (3.5 - 7.7)           | 20.6 (5.4 – 35.8)                       | 5.7 (0.0 – 13.0)                           |
| Nigeria- 2014      | 24.8 (21.0 - 28.7)        | 38.3 (30.5 – 46.1)                                   | 5.0 (1.9 – 8.0)                            | 3.5 (1.4 – 5.5)                               | 10.8 (8.7 – 13.0)         | 26.9 (18.1 – 35.7)                      | 2.6 (0.0 – 5.3)                            |
| Zambia- 2014       | 20.3 (16.4-24.3)          | 51.6 (41.3 – 62.0)                                   | 1.4 (0.0 – 3.2)                            | 7.2 (0.0 – 16.8)                              | 10.0 (6.9-13.0)           | 51.4 (38.2 – 64.6)                      | 7.2 (0.0 – 16.0)                           |
| Lao PDR- 2014      | 7.3 (4.9-9.8)             | 13.8 (3.8 – 23.8)                                    | <0.1***                                    | <0.1***                                       | 12.0 (8.9-15.1)           | 46.8 (33.6 – 60.1)                      | 32.6 (19.4 – 45.0)                         |
| Uganda- 2015       | 35.3 (30.4-40.2)          | 56.5 (49.7 – 63.3)                                   | 10.1 (5.5 – 14.6)                          | 7.7 (3.7 – 11.6)                              | 16.5 (14.2-18.7)          | 52.5 (44.4 – 60.6)                      | 6.4 (3.3 – 9.6)                            |
| Botswana- 2016     | 9.3 (7.5-11.2)            | 67.8 (57.0 – 78.7)                                   | 21.0 (12.7- 29.2)                          | 18.0 (10.2 – 25.9)                            | 5.5 (3.8-7.2)             | 47.8 (30.6 – 65.0)                      | 2.6 (0.0 – 7.4)                            |
| Honduras-2017      | 16.2 (14.0 - 18.5)        | 64.2 (57.3 - 71.1)                                   | 7.9 (4.1 - 11.6)                           | 5.9 (2.7 - 9.0)                               | 9.9 (8.2 - 11.6)          | 34.2 (25.8 - 42.6)                      | 4.1 (0.0 - 9.0)                            |
| El Salvador- 2018  | 13.5 (9.5 - 17.5)         | 72.9 (61.4 - 84.4)                                   | 16.3 (7.8 - 24.7)                          | 15.3 (7.6 - 22.9)                             | 2.5 (1.1 - 4.0)           | 50.7 (29.2 - 72.1)                      | <0.1***                                    |
| Colombia- 2018     | 17.8 (10.0 - 25.6)*       | 41.5 (23.6 - 59.4)*                                  | 7.6 (0.0 - 20.2)*                          | NA                                            | 6.6 (3.1 – 10.1)*         | 45.2 (25.5 - 64.9)*                     | 1.1 (0.0 - 2.9)                            |
| Côte d’Ivoire-2018 | 6.1 (3.2-9.1)             | 46.3 (37.2-55.5)                                     | 1.0 (0.0 – 3.1)                            | <0.1***                                       | 3.0 (1.2-4.7)             | 45.7 (35.5-55.8)                        | 2.6 (0.0 – 7.2)                            |
| Lesotho- 2018      | 14.5 (12.4-16.6)          | 39.3 (33.2 – 45.3)                                   | 11.4 (7.8 – 14.9)                          | 8.0 (4.7 – 11.3)                              | 5.0 (2.6-7.3)             | 23.2 (0.0 – 46.6)                       | <0.1***                                    |
| Namibia- 2019      | 11.8 (9.6 - 14.0)         | 50.0 (41.9 - 58.2)                                   | 10.5 (7.2 - 13.9)                          | 9.7 (6.5 - 12.9)                              | 7.3 (4.7 - 9.9)           | 31.2 (22.6 - 39.8)                      | **                                         |
| Moldova- 2019      | 14.4 (9.5 - 19.3)         | 37.1 (17.0 - 57.1)                                   | 4.9 (0.1 - 9.7)*                           | 3.6 (0.0 - 7.9)*                              | 5.3 (2.8 - 7.9)           | 18.0 (3.1 - 33.0)*                      | 3.3 (0.0 - 8.7)                            |
| Mozambique- 2019   | 14.3 (10.8 - 17.8)        | 32.2 (25.3 - 39.1)                                   | NP                                         | NP                                            | 8.4 (5.8 - 11.0)          | 28.7 (17.1 - 40.3)                      | NP                                         |

NP = Results not published or publicly released

NA = Results not available

\*RSE is >30% but less than or equal to 50%, results should be interpreted with caution

\*\*RSE is >50% and estimate is suppressed.

\*\*\* When the prevalence of an indicator is zero percent (0.0%), those results are denoted as <0.1% and should be interpreted with caution. It cannot be assumed that the

<sup>^</sup> Disclosure of SV includes childhood and adult exposure to SV if the survivor experienced multiple forms of SV spanning the life course. This is a limitation of this measure.

<sup>□</sup> Estimates are among 13–24-year-olds

† Confidence intervals are not reported in 2011 Zimbabwe public report  
Data and reports can be accessed at [www.togetherforgirls.org](http://www.togetherforgirls.org)

Confidential: For Review Only

1  
2  
3  
4  
5  
6  
7  
8  
9  
10  
11  
12  
13  
14  
15  
16  
17  
18  
19  
20  
21  
22  
23  
24  
25  
26  
27  
28  
29  
30  
31  
32  
33  
34  
35  
36  
37  
38  
39  
40  
41  
42  
43  
44  
45  
46  
47



Figure S1. Weighted prevalence of sexual violence before age 18 among male and female youth 18-24-years-old, Violence Against Children and Youth Surveys, 2007 - 2022

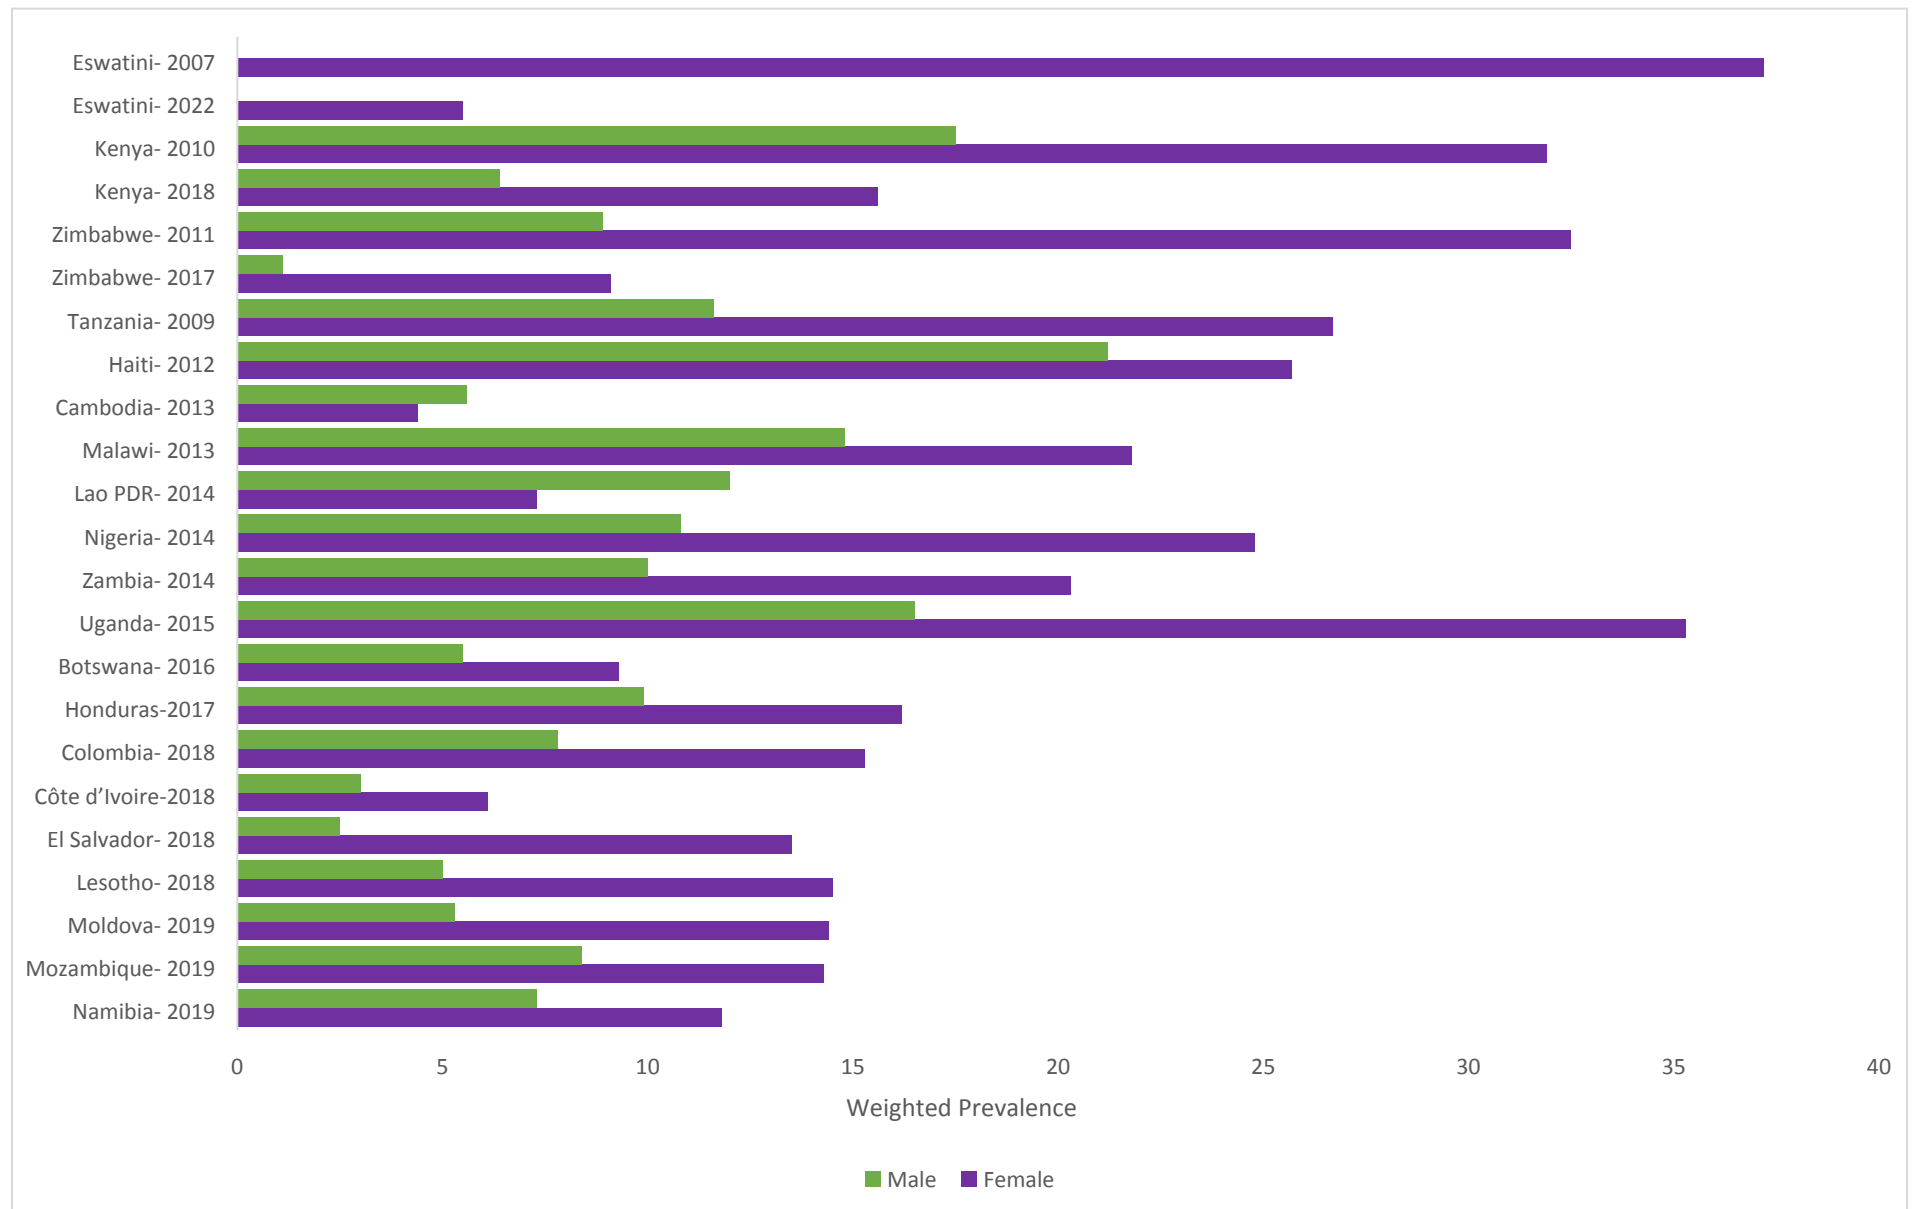

# BMJ Paediatrics Open

## Successful Child Sexual Violence Prevention Efforts Start with Data: How the Violence Against Children Survey Helped Curb the Tide of Child Sexual Violence in 20 Countries

|                               |                                                                                                                                                                                                                                                                                                                                                                                                                                                                                                                                                                                                                                                                         |
|-------------------------------|-------------------------------------------------------------------------------------------------------------------------------------------------------------------------------------------------------------------------------------------------------------------------------------------------------------------------------------------------------------------------------------------------------------------------------------------------------------------------------------------------------------------------------------------------------------------------------------------------------------------------------------------------------------------------|
| Journal:                      | <i>BMJ Paediatrics Open</i>                                                                                                                                                                                                                                                                                                                                                                                                                                                                                                                                                                                                                                             |
| Manuscript ID                 | bmjpo-2024-002497.R1                                                                                                                                                                                                                                                                                                                                                                                                                                                                                                                                                                                                                                                    |
| Article Type:                 | Viewpoint                                                                                                                                                                                                                                                                                                                                                                                                                                                                                                                                                                                                                                                               |
| Date Submitted by the Author: | 20-Feb-2024                                                                                                                                                                                                                                                                                                                                                                                                                                                                                                                                                                                                                                                             |
| Complete List of Authors:     | Chiang, Laura; CDC, Division of Violence Prevention<br>Miedema, Stephanie; CDC, Division of Violence Prevention<br>Saul, Janet; US Department of State, Bureau of Global Health Security and Diplomacy<br>Mercy, James; CDC, Division of Violence Prevention<br>Brooks, Andrew; UNICEF Eastern and Southern Africa Regional Office<br>Butchart, Alexander; World Health Organization, Prevention of Violence Unit<br>Bachman, Gretchen; USAID<br>Hegle, Jennifer; CDC, Division of Global HIV and TB<br>Ligiero, Daniela; Together for Girls<br>Logan, J.; CDC, Division of Global HIV and TB<br>Masseti, Greta; CDC, National Center for Injury Prevention and Control |
| Keywords:                     | Child Abuse, Epidemiology, Statistics                                                                                                                                                                                                                                                                                                                                                                                                                                                                                                                                                                                                                                   |
|                               |                                                                                                                                                                                                                                                                                                                                                                                                                                                                                                                                                                                                                                                                         |

SCHOLARONE™  
Manuscripts



I, the Submitting Author has the right to grant and does grant on behalf of all authors of the Work (as defined in the below author licence), an exclusive licence and/or a non-exclusive licence for contributions from authors who are: i) UK Crown employees; ii) where BMJ has agreed a CC-BY licence shall apply, and/or iii) in accordance with the terms applicable for US Federal Government officers or employees acting as part of their official duties; on a worldwide, perpetual, irrevocable, royalty-free basis to BMJ Publishing Group Ltd ("BMJ") its licensees and where the relevant Journal is co-owned by BMJ to the co-owners of the Journal, to publish the Work in this journal and any other BMJ products and to exploit all rights, as set out in our [licence](#).

The Submitting Author accepts and understands that any supply made under these terms is made by BMJ to the Submitting Author unless you are acting as an employee on behalf of your employer or a postgraduate student of an affiliated institution which is paying any applicable article publishing charge ("APC") for Open Access articles. Where the Submitting Author wishes to make the Work available on an Open Access basis (and intends to pay the relevant APC), the terms of reuse of such Open Access shall be governed by a Creative Commons licence – details of these licences and which [Creative Commons](#) licence will apply to this Work are set out in our licence referred to above.

Other than as permitted in any relevant BMJ Author's Self Archiving Policies, I confirm this Work has not been accepted for publication elsewhere, is not being considered for publication elsewhere and does not duplicate material already published. I confirm all authors consent to publication of this Work and authorise the granting of this licence.

1  
2  
3 Successful Child Sexual Violence Prevention Efforts Start with Data: How the Violence Against Children  
4 Survey Helped Curb the Tide of Child Sexual Violence in 20 Countries  
5  
6

7 *The views of the authors do not necessarily reflect those of the U. S. Government or Bureau of Global*  
8 *Health Security and Diplomacy/PEPFAR, the United States Agency for International Development, or the*  
9 *US Centers for Disease Control and Prevention*

10  
11 *Funding: This study did not receive any funding in any form*

12  
13 *No competing interest*  
14  
15

## 16 17 INTRODUCTION

18  
19 Violence against children is a pervasive global public health and human rights issue, with one billion  
20 children experiencing at least one form of violence annually [1]. Extensive scientific literature shows  
21 childhood adversity, including sexual violence, to be directly and indirectly associated with a host of  
22 health and social consequences with a dose-response effect, consequential intergenerational impacts,  
23 and sizable economic ramifications [2]. There is a dearth of population data on the prevalence of  
24 childhood sexual violence as well as its antecedents and health and social outcomes, which has  
25 hampered violence prevention and child protection efforts globally and locally. Population data are  
26 critical, alongside administrative data systems and statistical definitions and classification schemes [3],  
27 for governments to adequately begin addressing violence against children. The absence of national  
28 prevalence data has resulted in limited information to guide national policies and prevention strategies,  
29 monitor trends, and evaluate prevention efforts. Globally, lack of data on the epidemiologic patterns of  
30 violence against children has resulted in deficient prioritization for preventing and responding to this  
31 critical problem.  
32  
33

34  
35 Violence Against Children and Youth Surveys (VACS) collect comprehensive data on violence and have  
36 been implemented in over 23 countries in Africa, Asia, the Caribbean, Europe, and Latin America since  
37 2007. VACS have also been repeated in three countries: Zimbabwe (2011; 2017), Kenya (2010; 2019),  
38 and Eswatini (2007; 2022). VACS provide extensive data on the prevalence and contexts of all forms of  
39 violence, including sexual violence, therefore allowing for targeted prevention and response efforts.  
40 VACS further provide the global research community with data to examine the epidemiologic patterns of  
41 childhood sexual violence across countries and regions. VACS data have raised awareness and improved  
42 understanding of childhood sexual violence in many countries worldwide, and thereby catalyzed action.  
43  
44

45  
46 This article draws on VACS reports and empirical publications, to summarize and describe patterns in  
47 childhood sexual violence across countries that have completed VACS and shed light on the global  
48 prevalence of childhood sexual violence.  
49

## 50 METHODS

51  
52 VACS data from 20 countries was used to summarize the prevalence of childhood sexual violence from  
53 diverse regions of the world. Both estimates for countries that have repeated VACS are represented in  
54 this summary. VACS use a three-stage cluster randomized household sampling design to generate  
55 nationally representative estimates of violence against children [4]. Interviewer-administered surveys  
56 are conducted with male and female youth aged 13-24 years, who provide retrospective reports of  
57 lifetime experiences. A standard protocol ensures data comparability across countries and protections  
58 for participant safety and confidentiality. Participants in need of help with violence or other adversity  
59 are offered services and support.  
60

VACS collects data on physical, emotional, and sexual violence, but this discussion is focused on sexual  
violence. VACS collect data on four types of sexual violence: 1) unwanted sexual touching; 2) attempted  
forced sex; 3) forced sex; and 4) pressured sex. Experiences of one or more of these types of sexual  
violence prior to the age of 18 is defined as any childhood sexual violence.

## RESEARCH ETHICS APPROVAL STATEMENT

These studies were all approved by the CDC Institutional Review Board with the IRB ID of IORG0000112.  
Each country was also reviewed and approved by required local Institutional Review Boards or Ethical  
Review Committees as required and appropriate for each country.

## RESULTS

Data from 20 countries across four continents highlight that childhood sexual violence is a sizable problem, with lifetime prevalence estimates ranging from 4.4% in Cambodia to 37.2% in Eswatini (2007) for females and from 1.1% in Zimbabwe (2017) to 21.2% in Haiti for males (Table S1, Figure S1). The prevalence of childhood sexual violence declined in the three countries where the VACS was repeated. In Eswatini, data were only collected from females in the first VACS therefore a prevalence comparison was only allowable for the female population. The Eswatini results showed that childhood sexual violence reduced from 32.5% in 2007 to 5.5% in 2022 (Table S1, Figure S1). In Zimbabwe, childhood sexual violence reduced from 37.2% in 2011 to 9.1% in 2017 among girls; and reduced from 8.9% in 2011 to 1.1% in 2017 among boys (Table S1). In Kenya, the rate of childhood sexual violence reduced from 31.9% in 2010 to 15.6% in 2018 among girls and reduced from 17.5% in 2010 to 6.4% in 2018 among boys (Table S1, Figure S1).

Certain patterns also emerged with respect to contexts for childhood sexual violence. Common perpetrators of childhood sexual violence are people known to the child: intimate partners, friends and classmates, family, and neighbors (results available upon request). Further, childhood sexual violence most often takes place in homes or school (results available upon request). Across all countries, VACS find that many victims of childhood sexual violence do not disclose their experiences to anyone. Disclosure of childhood sexual violence to anyone ranged from 13.8% (Lao PDR) to 72.9% (El Salvador) among females, and from 17.3% (Zimbabwe 2017) to 64.7% (Malawi) among males. A smaller minority of victims try to seek professional services (<0.1%-25.7% among females; <0.1%-32.6% among males) and very few successfully receive any services for their experience/s (less than 5% in most of the countries).

## DISCUSSION

Results in this summary provide data from 24 published VACS reports from 20 countries, including three countries that have repeated VACS. This summary provides insight into the global prevalence and patterns of childhood sexual violence. VACS have raised awareness and improved understanding of childhood sexual violence in many countries worldwide, and thereby catalyzed action. After data collection and analysis, findings are disseminated to multi-sectoral partners within countries, including relevant government ministries, civil society, and multi-lateral institutions. These partners provide interpretive context to the results and identify prioritized actions to prevent and respond to childhood sexual violence in a data to action process. Since 2016, *INSPIRE: Seven Strategies to End Violence Against Children* (<https://www.who.int/publications/i/item/9789241565356>) has guided interpretation of VACS results and their use in guiding data-driven efforts to address all forms of violence against children, including sexual violence. INSPIRE has served as a framework to link prioritized indicators from VACS to evidence-based prevention and response programs and policies for countries to consider introducing, scaling up or evaluating, depending on their current national strategy.

While VACS cannot tell us why childhood sexual violence declined in all three sub-Saharan African countries that repeated the survey, we do know governments and stakeholders used survey results to guide violence prevention programming and policy. For example, after the 2010 Kenya VACS, the government instituted a new constitution which included articles explicitly protecting children from violence and shortly after passed the Children's Act (2012) and Marriage Act (2014), both of which further expanded legal protections [5]. In addition, PEPFAR (The President's Emergency Plan for AIDS Relief) and the Global Fund have made sizable contributions through HIV prevention programming in each of these three countries and integrates violence prevention interventions and post-violence care clinical services. A notable example is the DREAMS initiative that delivers a package of evidence-based programs on key risk factors of HIV among adolescent girls and young women, including sexual violence, and reaches approximately 2.9 million girls and young women each year [6]. VACS data have also informed PEPFAR's investments in strengthening child protection systems through its Orphans and Vulnerable Children programming. VACS results informed the establishment of a national child protection management system in Kenya, the introduction of a child-friendly courtroom in Eswatini, and the scale up of an evidence-based parenting intervention focused on reducing harsh discipline throughout East and Southern Africa [7].

It is important to consider the impact of UNICEF and WHO as key global health and child protection leaders as they have expanded their attention to violence, as well as the targeted work of partners such as Together for Girls who take a data driven focus specifically on childhood sexual violence elimination. As VACS continue to be implemented globally, and particularly as it is repeated in countries, a clearer

picture may emerge on global trends in childhood sexual violence. Current results show: a pattern of high prevalence; people who perpetrate are typically known and often trusted by their child victims; and sexual violence frequently occurs in homes and schools where children should be safest. Further, few victims of childhood sexual violence receive professional services. Patterns of VACS results continue to demonstrate the gendered nature of sexual violence against girls and boys and highlight the need for gender-informed interventions to reduce the risk and mitigate the consequences of childhood sexual violence for all youth. Continued and regular population-level data collection, such as through VACS, is critically important for countries to understand the burden, contexts, and consequences of violence against children and youth and to galvanize action.

This summary is subject to several limitations. First, VACS provide cross-sectional data or in countries that have repeated VACS, serial cross-sectional data. The surveys cannot provide information on why childhood sexual violence declined in those three countries where it has been repeated. Second, the VACS are adapted by key partners in each country and there is some variation in wording of questions between countries. Third, VACS are household surveys and do not collect data on children who are institutionalized or otherwise living outside family care. Complimentary research is needed globally and VACS countries to better understand and interpret patterns of childhood sexual violence, what is contributing to the observed reduction in prevalence and conduct research with youth not captured in a household survey who may be even more vulnerable to violence.

## CONCLUSION

Sexual violence in childhood is a public health and human rights issue with long-term consequences across the lifetime of the affected individuals as well as consequential societal and economic impacts. VACS have documented the prevalence and epidemiologic patterns across more than 24 countries, providing governments and key child protection partners with critical data that can catalyze multi-sectoral action. The countries that have repeated VACS have seen marked improvement in prevalence of violence, demonstrating that violence is preventable, not inevitable. VACS have provided countries with baseline data and in so doing, the survey has led to concerted action to improve this public health challenge, as demonstrated by the repeat VACS in Zimbabwe, Kenya and Eswatini. However, much more work remains, given the high prevalence rates still seen in many countries and to understand the reasons for the declining prevalence of childhood sexual violence that has been observed. Population level surveys repeated regularly and with close attention to ethical and methodological rigor, such as VACS, are a critical tool to elucidate the problem and ignite action.

## CITATIONS

- Hills S, Mercy J, Amobi A, Kress H. Global Prevalence of Past-year Violence Against Children: A Systematic Review and Minimum Estimates. *Pediatrics*. 2016 Mar;137(3):e20154079.doi: 10.1542/peds.2015-4079.
- Hughes K, Bellis M, Hardcastle K, Sethi D, Butchart A, Mikton C, Jones L, Dunne MP. The effect of multiple adverse childhood experiences on health: a systematic review and meta-analysis. *Lancet Public Health*. 2017 Aug;2(8):e356-e366.doi: 10.1016/S2468-2667(17)30118-4.
- United Nations Children's Fund, International Classification of Violence against Children, UNICEF, New York, 2023.
- Nguyen K, Kress H, Villaveces A, Massetti M. Sampling design and methodology of the Violence Against Children and Youth Surveys. *Injury Prevention*. 2019; 25:321–327. doi:10.1136/injuryprev-2018-042916.
- Annor F, Chiang L, Olouch P, Mang'oli V, Mogaka M, Mwangi M, Ngunjiri A, Obare F, Achia T, Patel P, Massetti GM, Dahlberg LL, Simon TR, Mercy JA. Changes in prevalence of violence and risk factors for violence and HIV among children and young people in Kenya: a comparison of the 2010 and 2019 Kenya Violence Against Children and Youth Surveys. *Lancet Glob Health*. 2022 Jan;10(1):e124-e133. doi: 10.1016/S2214-109X(21)00457-5.
- S Saul J, Toiv N, Cooney C, Beamon T, Borgman M, Bachman G, Akom E, Benevides R, Limb A, Sato K, Achrekar A, Birx D. The evolution of DREAMS: using data for continuous program improvement. *AIDS*. 2022 Jun 15;36(Suppl 1): S5-S14. doi: 10.1097/QAD.0000000000003158. PMID: 35766571.
- L. Cluver, Y. Shenderovich, F. Meinck, M.N. Berezin, J. Doubt, C.L. Ward, J. Parra-Cardona, C. Lombard, J.M. Lachman, C. Wittesaele, I. Wessels, F. Gardner, J.I. Steinert. Parenting, mental health and economic

1  
2  
3 pathways to prevention of violence against children in South Africa. Social Science & Medicine, Volume  
4 262, 2020. ISSN 0277-9536. doi: 10.1016/j.socscimed.2020.113194  
5  
6  
7  
8  
9  
10  
11  
12  
13  
14  
15  
16  
17  
18  
19  
20  
21  
22  
23  
24  
25  
26  
27  
28  
29  
30  
31  
32  
33  
34  
35  
36  
37  
38  
39  
40  
41  
42  
43  
44  
45  
46  
47  
48  
49  
50  
51  
52  
53  
54  
55  
56  
57  
58  
59  
60

Confidential: For Review Only

Figure S1. Weighted prevalence of sexual violence before age 18 among male and female youth 18-24-years-old, Violence Against Children and Youth Surveys, 2007 - 2022

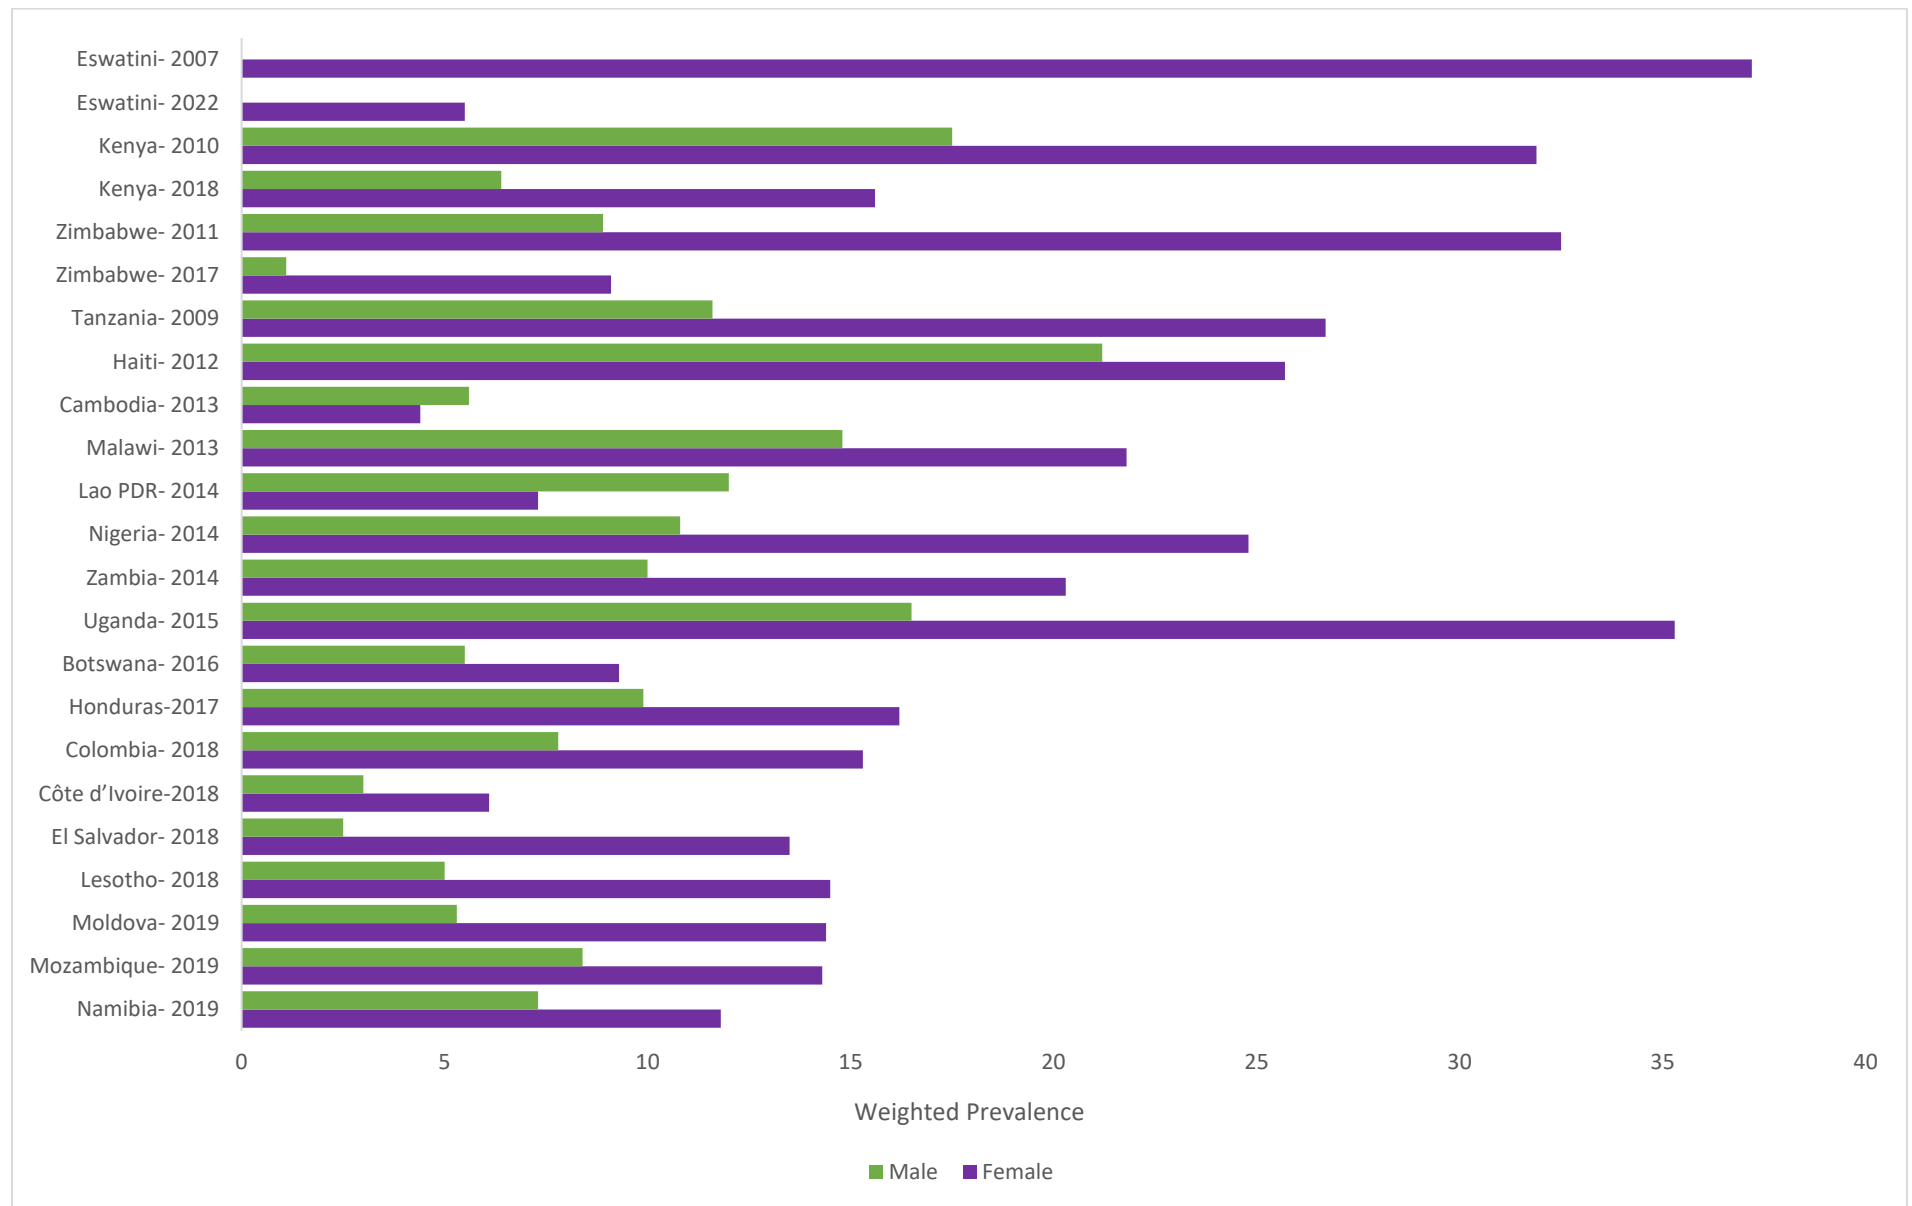



Table S1. Prevalence, disclosure, and receipt of services of sexual violence before age 18, among 18-24-year-olds, Violence Against Children and Youth Surveys, 2007 - 2022

|                       | Female                    |                                                      |                                            |                                               | Male                      |                                         |                                            |                                               |
|-----------------------|---------------------------|------------------------------------------------------|--------------------------------------------|-----------------------------------------------|---------------------------|-----------------------------------------|--------------------------------------------|-----------------------------------------------|
|                       | Childhood sexual violence | Disclosure of childhood sexual violence <sup>^</sup> | Help-seeking for childhood sexual violence | Receipt of help for childhood sexual violence | Childhood sexual violence | Disclosure of childhood sexual violence | Help-seeking for childhood sexual violence | Receipt of help for childhood sexual violence |
|                       | Weighted % (95% CI)       | Weighted % (95% CI)                                  | Weighted % (95% CI)                        | Weighted % (95% CI)                           | Weighted % (95% CI)       | Weighted % (95% CI)                     | Weighted % (95% CI)                        | Weighted % (95% CI)                           |
| 8 Eswatini- 2007      | 33.3 (32.7 - 41.6)        | 48.0 (40.8 - 55.2)                                   | NA                                         | 13.6 (10.6 - 17.4)                            | -                         | -                                       | -                                          | -                                             |
| 9 Eswatini- 2022      | 5.5 (4.5-6.5)             | 66.3 (60.9 - 71.7) <sup>o</sup>                      | 25.7 (20.8 - 30.6) <sup>o</sup>            | 23.1 (18.4 - 27.8) <sup>o</sup>               | 2.1 (0.7 - 3.4)*          | 48.4 (32.9 - 63.8) <sup>o</sup>         | **                                         | **                                            |
| 10 Kenya- 2010        | 31.9 (27.0-36.7)          | 45.9 (38.8 - 53.1)                                   | 6.8 (1.3 - 12.3)                           | 3.4 (0.0 - 7.0)                               | 17.5 (12.9-22.0)          | 35.8 (23.6 - 48.0)                      | 2.1 (0.0 - 4.6)                            | 0.4 (0.0 - 1.3)                               |
| 11 Kenya- 2018        | 15.6 (12.5-18.7)          | 41.3 (31.0 - 51.6)                                   | 12.5 (7.4 - 17.7)                          | 10.7 (5.8 - 15.7)                             | 6.4 (2.8-10.0)            | 26.7 (9.8 - 43.6)*                      | 3.2 (1.6 - 4.7)                            | 3.2 (1.6 - 4.7)                               |
| 12 Zimbabwe- 2011     | 32.5 (27.7 - 37.3)        | 51.8 <sup>†</sup>                                    | 4.3 <sup>†</sup>                           | 2.7 <sup>†</sup>                              | 8.9 (6.1 - 11.6)          | 45.1 <sup>†</sup>                       | 2.4 <sup>†</sup>                           | 2.4 <sup>†</sup>                              |
| 13 Zimbabwe- 2017     | 9.1 (8.1-10.0)            | 60.8 (55.7 - 65.9)                                   | 17.1 (13.1-21.2)                           | 14.3 (10.4 - 18.1)                            | 1.1 (0.3-2.0)             | 17.3 (0.0 - 48.1)                       | **                                         | **                                            |
| 14 Tanzania- 2009     | 26.7 (22.1 - 31.3)        | 52.3 (41.7 - 62.7) <sup>o</sup>                      | 22.0 (16.0 - 29.5) <sup>o</sup>            | 13.0 (7.7 - 21.2) <sup>o</sup>                | 11.6 (8.0 - 15.2)         | 31.4 (21.8 - 42.8) <sup>o</sup>         | 11.5 (6.7 - 19.2) <sup>o</sup>             | 3.7 (1.1-11.2)* <sup>o</sup>                  |
| 15 Haiti- 2012        | 25.7 (21.8 - 29.6)        | 57.0 (48.3 - 65.7)                                   | NP                                         | NP                                            | 21.2 (17.1 - 25.3)        | 37.4 (28.1 - 46.7)                      | NP                                         | NP                                            |
| 16 Malawi- 2013       | 21.8 (17.7 - 25.9)        | 61.2 (51.3-71.2)                                     | 9.6 (0.0 - 23.5)                           | 9.0 (0.0 - 22.8)                              | 14.8 (10.2 - 19.5)        | 64.7 (50.7 - 78.7)                      | 5.9 (0.0 - 11.7)                           | 5.9 (0.0 - 11.7)                              |
| 17 Cambodia- 2013     | 4.4 (2.5 - 6.3)           | 50.6 (32.4 - 68.9)                                   | 38.9 (19.4 - 58.4)                         | NA                                            | 5.6 (3.5 - 7.7)           | 20.6 (5.4 - 35.8)                       | 5.7 (0.0 - 13.8)                           | NA                                            |
| 18 Nigeria- 2014      | 24.8 (21.0 - 28.7)        | 38.3 (30.5 - 46.1)                                   | 5.0 (1.9 - 8.0)                            | 3.5 (1.4 - 5.5)                               | 10.8 (8.7 - 13.0)         | 26.9 (18.1 - 35.7)                      | 2.6 (0.0 - 5.3)                            | 1.5 (0.0 - 3.4)                               |
| 19 Zambia- 2014       | 20.3 (16.4-24.3)          | 51.6 (41.3 - 62.0)                                   | 1.4 (0.0 - 3.2)                            | 7.2 (0.0 - 16.8)                              | 10.0 (6.9-13.0)           | 51.4 (38.2 - 64.6)                      | 7.2 (0.0 - 16.8)                           | 7.2 (0.0 - 16.8)                              |
| 20 Lao PDR- 2014      | 7.3 (4.9-9.8)             | 13.8 (3.8 - 23.8)                                    | <0.1***                                    | <0.1***                                       | 12.0 (8.9-15.1)           | 46.8 (33.6 - 60.1)                      | 32.6 (19.4 - 45.8)                         | 26.2 (14.7 - 37.7)                            |
| 21 Uganda- 2015       | 35.3 (30.4-40.2)          | 56.5 (49.7 - 63.3)                                   | 10.1 (5.5 - 14.6)                          | 7.7 (3.7 - 11.6)                              | 16.5 (14.2-18.7)          | 52.5 (44.4 - 60.6)                      | 6.4 (3.3 - 9.6)                            | 4.6 (1.9 - 7.4)                               |
| 22 Botswana- 2016     | 9.3 (7.5-11.2)            | 67.8 (57.0 - 78.7)                                   | 21.0 (12.7- 29.2)                          | 18.0 (10.2 - 25.9)                            | 5.5 (3.8-7.2)             | 47.8 (30.6 - 65.0)                      | 2.6 (0.0 - 7.4)                            | 2.6 (0.0 - 7.3)                               |
| 23 Honduras-2017      | 16.2 (14.0 - 18.5)        | 64.2 (57.3 - 71.1)                                   | 7.9 (4.1 - 11.6)                           | 5.9 (2.7 - 9.0)                               | 9.9 (8.2 - 11.6)          | 34.2 (25.8 - 42.6)                      | 4.1 (0.0 - 9.0)                            | 0.9 (0.0 - 2.8)*                              |
| 24 El Salvador- 2018  | 13.5 (9.5 - 17.5)         | 72.9 (61.4 - 84.4)                                   | 16.3 (7.8 - 24.7)                          | 15.3 (7.6 - 22.9)                             | 2.5 (1.1 - 4.0)           | 50.7 (29.2 - 72.1)                      | <0.1***                                    | <0.1***                                       |
| 25 Colombia- 2018     | 17.8 (10.0 - 25.6)*       | 41.5 (23.6 - 59.4)*                                  | 7.6 (0.0 - 20.2)*                          | NA                                            | 6.6 (3.1 - 10.1)*         | 45.2 (25.5 - 64.9)*                     | 1.1 (0.0 - 2.9)*                           | NA                                            |
| 26 Côte d'Ivoire-2018 | 6.1 (3.2-9.1)             | 46.3 (37.2-55.5)                                     | 1.0 (0.0 - 3.1)                            | <0.1***                                       | 3.0 (1.2-4.7)             | 45.7 (35.5-55.8)                        | 2.6 (0.0 - 7.2)                            | 2.6 (0.0 - 7.2)                               |
| 27 Lesotho- 2018      | 14.5 (12.4-16.6)          | 39.3 (33.2 - 45.3)                                   | 11.4 (7.8 - 14.9)                          | 8.0 (4.7 - 11.3)                              | 5.0 (2.6-7.3)             | 23.2 (0.0 - 46.6)                       | <0.1***                                    | <0.1***                                       |
| 28 Namibia- 2019      | 11.8 (9.6 - 14.0)         | 50.0 (41.9 - 58.2)                                   | 10.5 (7.2 - 13.9)                          | 9.7 (6.5 - 12.9)                              | 7.3 (4.7 - 9.9)           | 31.2 (22.6 - 39.8)                      | **                                         | **                                            |
| 29 Moldova- 2019      | 14.4 (9.5 - 19.3)         | 37.1 (17.0 - 57.1)                                   | 4.9 (0.1 - 9.7)*                           | 3.6 (0.0 - 7.9)*                              | 5.3 (2.8 - 7.9)           | 18.0 (3.1 - 33.0)*                      | 3.3 (0.0 - 8.7)*                           | 0.7 (0.0 - 2.0)*                              |
| 30 Mozambique- 2019   | 14.3 (10.8 - 17.8)        | 32.2 (25.3 - 39.1)                                   | NP                                         | NP                                            | 8.4 (5.8 - 11.0)          | 28.7 (17.1 - 40.3)                      | NP                                         | NP                                            |

NP = Results not published or publicly released

NA = Results not available

\*RSE is >30% but less than or equal to 50%, results should be interpreted with caution

\*\*RSE is >50% and estimate is suppressed.

\*\*\* When the prevalence of an indicator is zero percent (0.0%), those results are denoted as <0.1% and should be interpreted with caution. It cannot be assumed that the prevalence of the item in the entire population is an absolute zero.

<sup>^</sup> Disclosure of SV includes childhood and adult exposure to SV if the survivor experienced multiple forms of SV spanning the life course. This is a limitation of this measure.

<sup>o</sup> Estimates are among 13-24-year-olds

<sup>†</sup> Confidence intervals are not reported in 2011 Zimbabwe public report

Data and reports can be accessed at [www.togetherforgirls.org](http://www.togetherforgirls.org)

Confidential: For Review Only

1  
2  
3  
4  
5  
6  
7  
8  
9  
10  
11  
12  
13  
14  
15  
16  
17  
18  
19  
20  
21  
22  
23  
24  
25  
26  
27  
28  
29  
30  
31  
32  
33  
34  
35  
36  
37  
38  
39  
40  
41  
42  
43  
44  
45  
46  
47
