# Supplementary material for: Successful child sexual violence prevention efforts start with data: how the Violence Against Children and Youth Survey helped curb the tide of child sexual violence in 20 countries
Source: PubMed Central journal article supplement — BMJ Paediatr Open. 2024 Mar 12;8(1):e002497. doi: 10.1136/bmjpo-2024-002497 (PMC10936510; doi:10.1136/bmjpo-2024-002497), 2024-03-12

Figure S1. Weighted prevalence of sexual violence before age 18 among male and female youth 18-24-years-old, Violence Against Children and Youth Surveys, 2007 - 2022

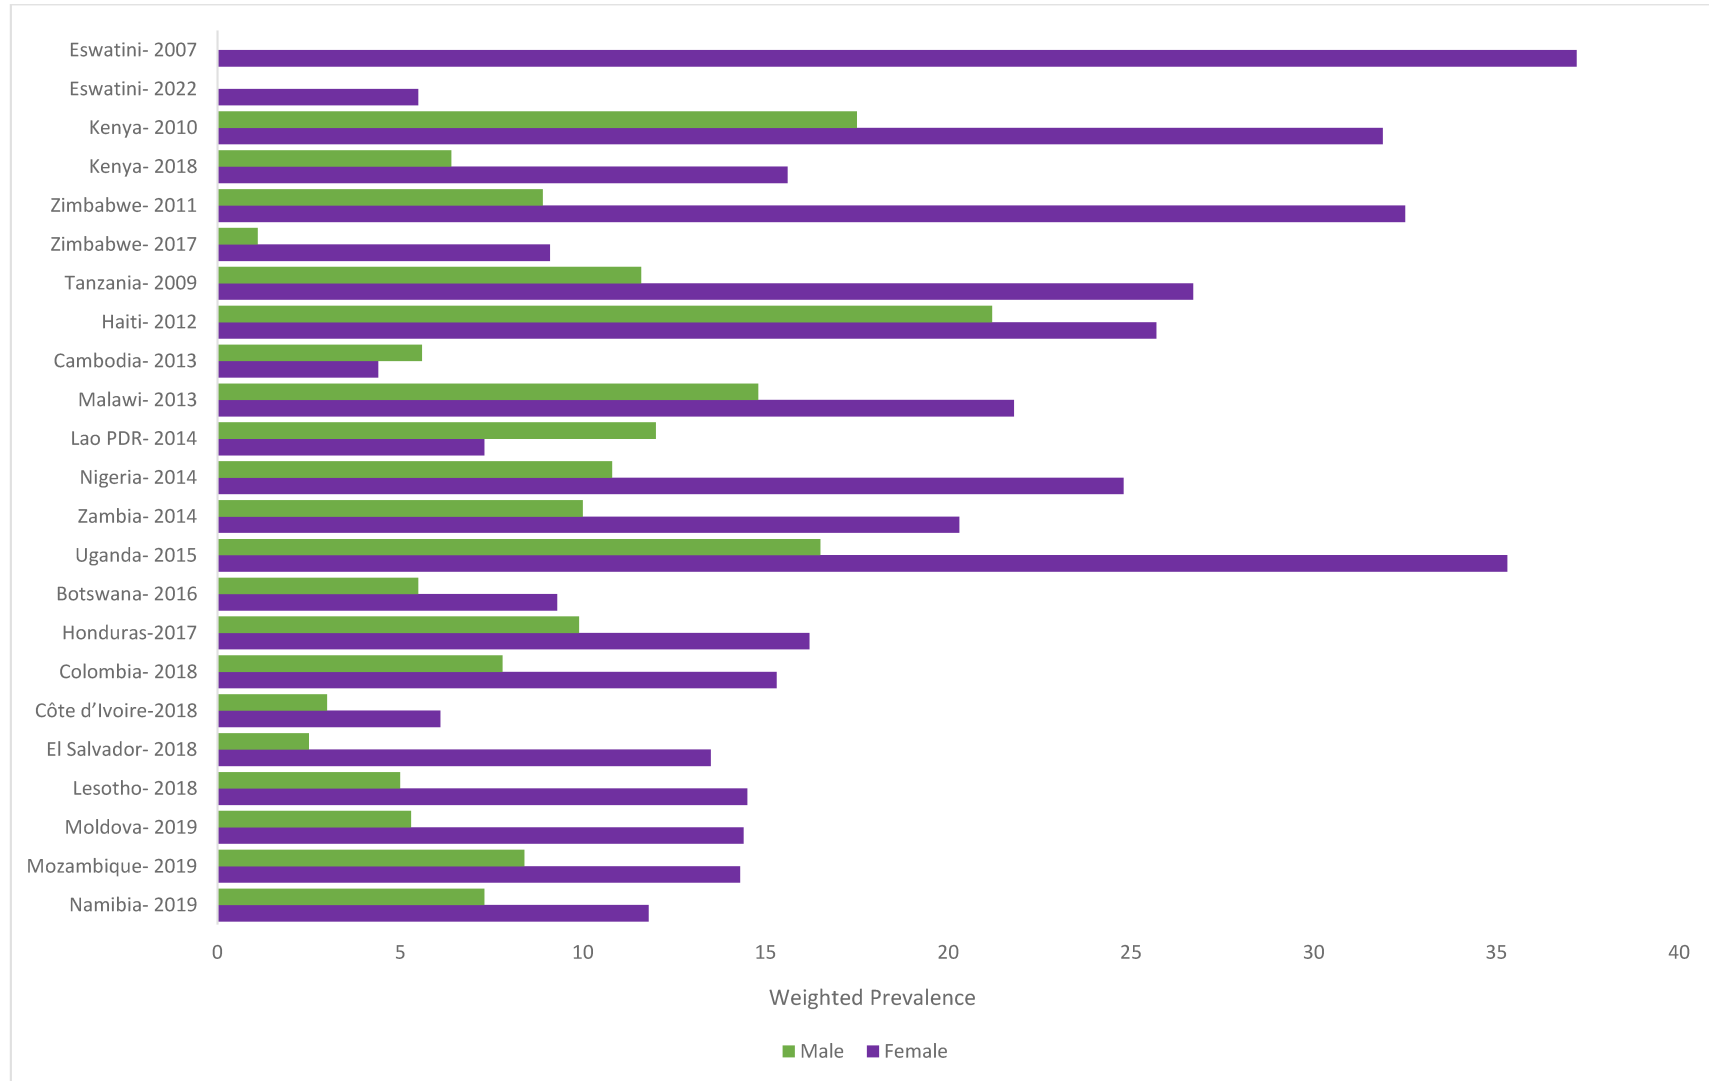

Supplement: bmjpo-2024-002497supp001.pdf [file bmjpo-2024-002497supp001.pdf]
