# Supplementary material for: Successful child sexual violence prevention efforts start with data: how the Violence Against Children and Youth Survey helped curb the tide of child sexual violence in 20 countries
Source: PubMed Central journal article supplement — BMJ Paediatr Open. 2024 Mar 12;8(1):e002497. doi: 10.1136/bmjpo-2024-002497 (PMC10936510; doi:10.1136/bmjpo-2024-002497), 2024-03-12
Supplement: bmjpo-2024-002497supp002.pdf [file bmjpo-2024-002497supp002.pdf]

| Table S1. Prevalence, disclosure, and receipt of services of sexual violence before age 18, among 18-24-year-olds, Violence Against Children and Youth Surveys, 2007 - 2022 |                           |                                                      |                                            |                                               |                           |                                         |                                            |                                               |
|-----------------------------------------------------------------------------------------------------------------------------------------------------------------------------|---------------------------|------------------------------------------------------|--------------------------------------------|-----------------------------------------------|---------------------------|-----------------------------------------|--------------------------------------------|-----------------------------------------------|
|                                                                                                                                                                             | Female                    |                                                      |                                            |                                               | Male                      |                                         |                                            |                                               |
|                                                                                                                                                                             | Childhood sexual violence | Disclosure of childhood sexual violence <sup>^</sup> | Help-seeking for childhood sexual violence | Receipt of help for childhood sexual violence | Childhood sexual violence | Disclosure of childhood sexual violence | Help-seeking for childhood sexual violence | Receipt of help for childhood sexual violence |
|                                                                                                                                                                             | Weighted % (95% CI)       | Weighted % (95% CI)                                  | Weighted % (95% CI)                        | Weighted % (95% CI)                           | Weighted % (95% CI)       | Weighted % (95% CI)                     | Weighted % (95% CI)                        | Weighted % (95% CI)                           |
| Eswatini- 2007                                                                                                                                                              | 37.8 (33.1 – 42.6)        | 48.0 (40.8 – 55.2)                                   | NA                                         | 13.6 (10.6 – 17.4)                            | -                         | -                                       | -                                          | -                                             |
| Eswatini- 2022                                                                                                                                                              | 5.5 (4.5-6.5)             | 66.3 (60.9 – 71.7) <sup>o</sup>                      | 25.7 (20.8 – 30.6) <sup>o</sup>            | 23.1 (18.4 – 27.8) <sup>o</sup>               | 2.1 (0.7 – 3.4)*          | 48.4 (32.9 – 63.8) <sup>o</sup>         | **                                         | **                                            |
| Kenya- 2010                                                                                                                                                                 | 31.9 (27.0-36.7)          | 45.9 (38.8 - 53.1)                                   | 6.8 (1.3 - 12.3)                           | 3.4 (0.0 - 7.0)                               | 17.5 (12.9-22.0)          | 35.8 (23.6 - 48.0)                      | 2.1 (0.0 - 4.6)                            | 0.4 (0.0 - 1.3)                               |
| Kenya- 2018                                                                                                                                                                 | 15.6 (12.5-18.7)          | 41.3 (31.0 - 51.6)                                   | 12.5 (7.4 - 17.7)                          | 10.7 (5.8 - 15.7)                             | 6.4 (2.8-10.0)            | 26.7 (9.8 - 43.6)*                      | 3.2 (1.6 - 4.7)                            | 3.2 (1.6 - 4.7)                               |
| Zimbabwe- 2011                                                                                                                                                              | 32.5 (27.7 - 37.3)        | 51.8 <sup>†</sup>                                    | 4.3 <sup>†</sup>                           | 2.7 <sup>†</sup>                              | 8.9 (6.1 - 11.6)          | 45.1 <sup>†</sup>                       | 2.4 <sup>†</sup>                           | 2.4 <sup>†</sup>                              |
| Zimbabwe- 2017                                                                                                                                                              | 9.1 (8.1–10.0)            | 60.8 (55.7 – 65.9)                                   | 17.1 (13.1-21.2)                           | 14.3 (10.4 – 18.1)                            | 1.1 (0.3–2.0)             | 17.3 (0.0 – 48.1)                       | **                                         | **                                            |
| Tanzania- 2009                                                                                                                                                              | 26.7 (22.1 - 31.3)        | 52.3 (41.7 – 62.7) <sup>o</sup>                      | 22.0 (16.0 – 29.5) <sup>o</sup>            | 13.0 (7.7 – 21.2) <sup>o</sup>                | 11.6 (8.0 - 15.2)         | 31.4 (21.8 – 42.8) <sup>o</sup>         | 11.5 (6.7 – 19.2) <sup>o</sup>             | 3.7 (1.1-11.2)* <sup>o</sup>                  |
| Haiti- 2012                                                                                                                                                                 | 25.7 (21.8 - 29.6)        | 57.0 (48.3 – 65.7)                                   | NP                                         | NP                                            | 21.2 (17.1 - 25.3)        | 37.4 (28.1 – 46.7)                      | NP                                         | NP                                            |
| Malawi- 2013                                                                                                                                                                | 21.8 (17.7 - 25.9)        | 61.2 (51.3-71.2)                                     | 9.6 (0.0 – 23.5)                           | 9.0 (0.0 – 22.8)                              | 14.8 (10.2 - 19.5)        | 64.7 (50.7 – 78.7)                      | 5.9 (0.0 – 11.7)                           | 5.9 (0.0 – 11.7)                              |
| Cambodia- 2013                                                                                                                                                              | 4.4 (2.5 - 6.3)           | 50.6 (32.4 – 68.9)                                   | 38.9 (19.4 – 58.4)                         | NA                                            | 5.6 (3.5 - 7.7)           | 20.6 (5.4 – 35.8)                       | 5.7 (0.0 – 13.8)                           | NA                                            |
| Nigeria- 2014                                                                                                                                                               | 24.8 (21.0 - 28.7)        | 38.3 (30.5 – 46.1)                                   | 5.0 (1.9 – 8.0)                            | 3.5 (1.4 – 5.5)                               | 10.8 (8.7 – 13.0)         | 26.9 (18.1 – 35.7)                      | 2.6 (0.0 – 5.3)                            | 1.5 (0.0 – 3.4)                               |
| Zambia- 2014                                                                                                                                                                | 20.3 (16.4-24.3)          | 51.6 (41.3 – 62.0)                                   | 1.4 (0.0 – 3.2)                            | 7.2 (0.0 – 16.8)                              | 10.0 (6.9-13.0)           | 51.4 (38.2 – 64.6)                      | 7.2 (0.0 – 16.8)                           | 7.2 (0.0 – 16.8)                              |
| Lao PDR- 2014                                                                                                                                                               | 7.3 (4.9-9.8)             | 13.8 (3.8 – 23.8)                                    | <0.1***                                    | <0.1***                                       | 12.0 (8.9-15.1)           | 46.8 (33.6 – 60.1)                      | 32.6 (19.4 – 45.8)                         | 26.2 (14.7 – 37.7)                            |
| Uganda- 2015                                                                                                                                                                | 35.3 (30.4-40.2)          | 56.5 (49.7 – 63.3)                                   | 10.1 (5.5 – 14.6)                          | 7.7 (3.7 – 11.6)                              | 16.5 (14.2-18.7)          | 52.5 (44.4 – 60.6)                      | 6.4 (3.3 – 9.6)                            | 4.6 (1.9 – 7.4)                               |
| Botswana- 2016                                                                                                                                                              | 9.3 (7.5-11.2)            | 67.8 (57.0 – 78.7)                                   | 21.0 (12.7- 29.2)                          | 18.0 (10.2 – 25.9)                            | 5.5 (3.8-7.2)             | 47.8 (30.6 – 65.0)                      | 2.6 (0.0 – 7.4)                            | 2.6 (0.0 – 7.3)                               |
| Honduras-2017                                                                                                                                                               | 16.2 (14.0 - 18.5)        | 64.2 (57.3 - 71.1)                                   | 7.9 (4.1 - 11.6)                           | 5.9 (2.7 - 9.0)                               | 9.9 (8.2 - 11.6)          | 34.2 (25.8 - 42.6)                      | 4.1 (0.0 - 9.0)                            | 0.9 (0.0 - 2.8)*                              |
| El Salvador- 2018                                                                                                                                                           | 13.5 (9.5 - 17.5)         | 72.9 (61.4 - 84.4)                                   | 16.3 (7.8 - 24.7)                          | 15.3 (7.6 - 22.9)                             | 2.5 (1.1 - 4.0)           | 50.7 (29.2 - 72.1)                      | <0.1***                                    | <0.1***                                       |
| Colombia- 2018                                                                                                                                                              | 17.8 (10.0 - 25.6)*       | 41.5 (23.6 - 59.4)*                                  | 7.6 (0.0 - 20.2)*                          | NA                                            | 6.6 (3.1 – 10.1)*         | 45.2 (25.5 - 64.9)*                     | 1.1 (0.0 - 2.9)*                           | NA                                            |
| Côte d'Ivoire-2018                                                                                                                                                          | 6.1 (3.2-9.1)             | 46.3 (37.2-55.5)                                     | 1.0 (0.0 – 3.1)                            | <0.1***                                       | 3.0 (1.2-4.7)             | 45.7 (35.5-55.8)                        | 2.6 (0.0 – 7.2)                            | 2.6 (0.0 – 7.2)                               |
| Lesotho- 2018                                                                                                                                                               | 14.5 (12.4-16.6)          | 39.3 (33.2 – 45.3)                                   | 11.4 (7.8 – 14.9)                          | 8.0 (4.7 – 11.3)                              | 5.0 (2.6-7.3)             | 23.2 (0.0 – 46.6)                       | <0.1***                                    | <0.1***                                       |
| Namibia- 2019                                                                                                                                                               | 11.8 (9.6 - 14.0)         | 50.0 (41.9 - 58.2)                                   | 10.5 (7.2 - 13.9)                          | 9.7 (6.5 - 12.9)                              | 7.3 (4.7 - 9.9)           | 31.2 (22.6 - 39.8)                      | **                                         | **                                            |
| Moldova- 2019                                                                                                                                                               | 14.4 (9.5 - 19.3)         | 37.1 (17.0 - 57.1)                                   | 4.9 (0.1 - 9.7)*                           | 3.6 (0.0 - 7.9)*                              | 5.3 (2.8 - 7.9)           | 18.0 (3.1 - 33.0)*                      | 3.3 (0.0 - 8.7)*                           | 0.7 (0.0 - 2.0)*                              |
| Mozambique- 2019                                                                                                                                                            | 14.3 (10.8 - 17.8)        | 32.2 (25.3 - 39.1)                                   | NP                                         | NP                                            | 8.4 (5.8 - 11.0)          | 28.7 (17.1 - 40.3)                      | NP                                         | NP                                            |

NP = Results not published or publicly released

NA = Results not available

\*RSE is >30% but less than or equal to 50%, results should be interpreted with caution

\*\*RSE is >50% and estimate is suppressed.

\*\*\* When the prevalence of an indicator is zero percent (0.0%), those results are denoted as <0.1% and should be interpreted with caution. It cannot be assumed that the prevalence of the item in the entire population is an absolute zero.

<sup>^</sup> Disclosure of SV includes childhood and adult exposure to SV if the survivor experienced multiple forms of SV spanning the life course. This is a limitation of this measure.

<sup>o</sup> Estimates are among 13–24-year-olds

<sup>†</sup> Confidence intervals are not reported in 2011 Zimbabwe public report

Data and reports can be accessed at [www.togetherforgirls.org](http://www.togetherforgirls.org)
